# Supplementary material for: Low DAPK1 expression correlates with poor prognosis and sunitinib resistance in clear cell renal cell carcinoma
Source: publisher site journal article supplement (doi:10.18632/aging.103638), 2020-11-16
Supplement: Supplementary file [file aging-v13i2-103638-supplementary-material-SD1.pdf]

SUPPLEMENTARY FIGURE

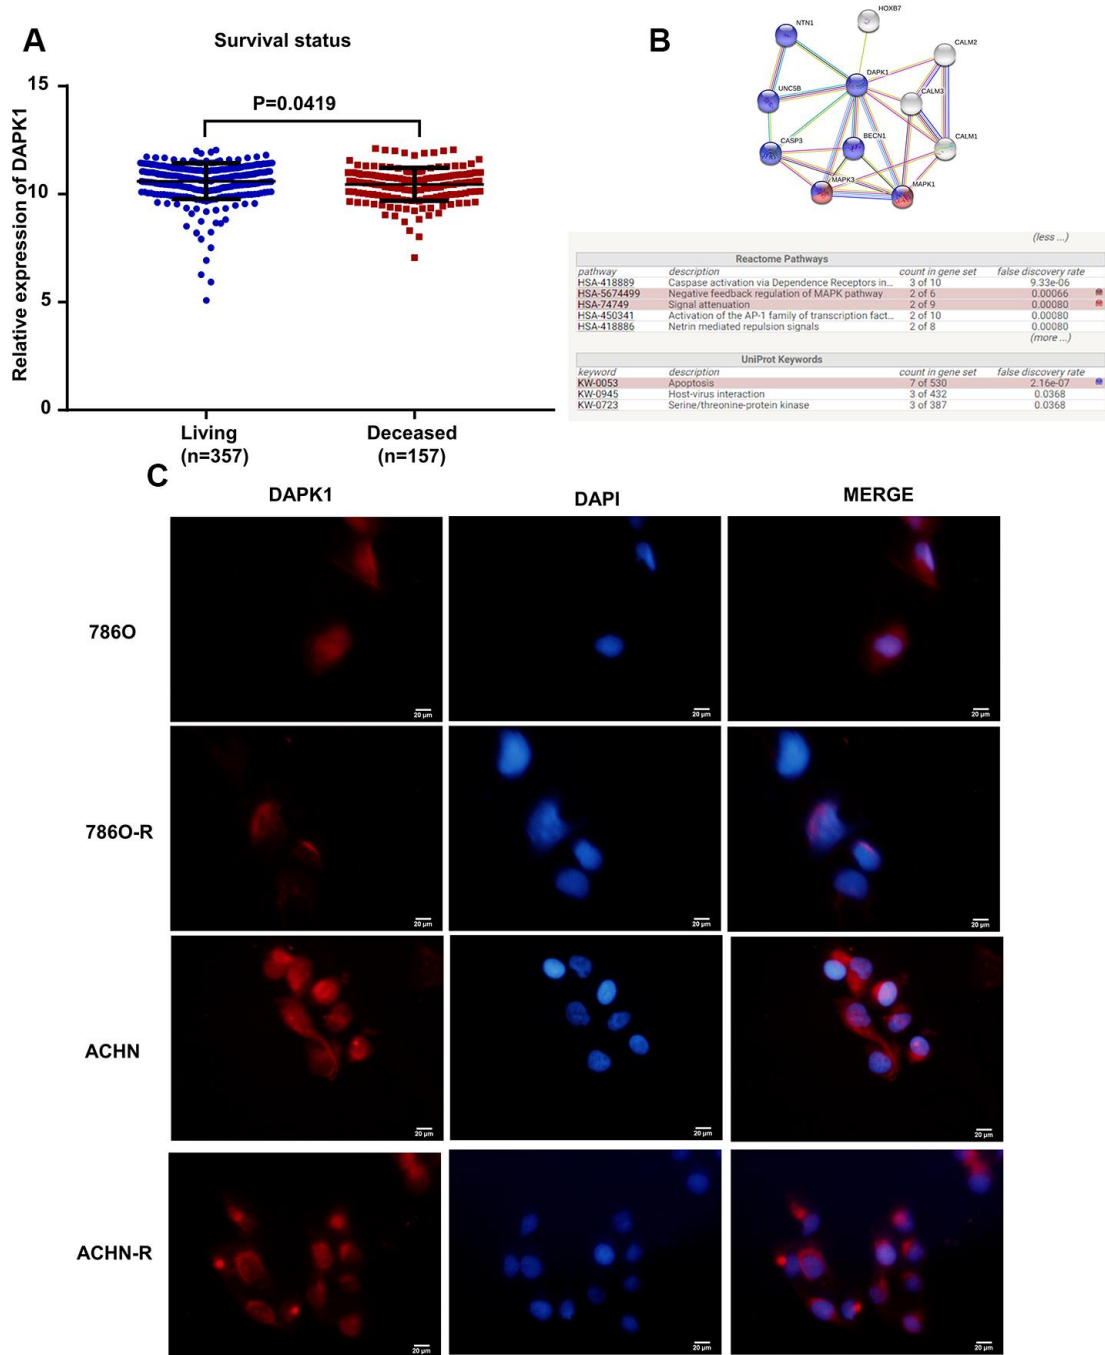

**Supplementary Figure 1. PPI network analysis of DAPK1-interacting genes and DAPK1 expression in sunitinib-resistant ccRCC cells. (A)** In TCGA-KIRC dataset, the DAPK1 mRNA levels in ccRCC patients with distinct survival status. **(B)** PPI network analysis shows the genes that interact with DAPK1. **(C)** Immunofluorescence assays show DAPK1 expression in parental cells and sunitinib-resistant ccRCC cells. The bar graphs show the means  $\pm$  SEM of three independent experiments. \*\*\* $p < 0.001$ , \*\* $p < 0.01$ , \* $p < 0.05$ .
